# Supplementary material for: Targeting pro-inflammatory cytokines following joint injury: acute intra-articular inhibition of interleukin-1 following knee injury prevents post-traumatic arthritis
Source: PubMed Central journal article supplement (PMC4229982; doi:10.1186/ar4591), 2014-06-25
Supplement: ar4591-S1.pdf [file ar4591-S1.pdf]

**Additional File 1.** Native serum levels of mouse IL-1Ra or sTNFRII. Concentrations of mouse IL-1Ra or sTNFRII were quantified in serum obtained at time of sacrifice in those animals that received either local or systemic administration of saline, IL-1Ra or sTNFRII following articular fracture. Data presented as mean  $\pm$  standard deviation.

**Native mouse IL-1Ra**

| Group           | Serum conc. (pg/ml) |
|-----------------|---------------------|
| Local-Saline    | 892 $\pm$ 277       |
| Local-IL-1Ra    | 1132 $\pm$ 236      |
| Systemic-Saline | 1285 $\pm$ 543      |
| Systemic-IL-1Ra | 2033 $\pm$ 849      |

**Native mouse sTNFRII**

| Group            | Serum conc. (pg/ml) |
|------------------|---------------------|
| Local-Saline     | 5593 $\pm$ 2739     |
| Local-sTNFRII    | 5603 $\pm$ 1276     |
| Systemic-Saline  | 4680 $\pm$ 1008     |
| Systemic-sTNFRII | 4979 $\pm$ 2260     |
