# Supplementary material for: Targeting pro-inflammatory cytokines following joint injury: acute intra-articular inhibition of interleukin-1 following knee injury prevents post-traumatic arthritis
Source: PubMed Central journal article supplement (PMC4229982; doi:10.1186/ar4591), 2014-06-25
Supplement: ar4591-S2.pdf [file ar4591-S2.pdf]

**Additional file 2.** Bone morphology as measured by micro-Computed Tomography (microCT). Bone morphology was assessed for the contra-lateral control (R) and fractured limbs (L) in the tibial plateau, tibial metaphysis, and femoral condyles. Data presented as mean  $\pm$  standard deviation with statistical analysis of the difference between Fractured (L) – Control (R) limbs; \*difference between paired limbs is significantly different than zero (one sample t-test,  $p < 0.05$ ); #significant difference among treatment groups (one-way ANOVA with Fisher LSD post-hoc,  $p < 0.05$ ).

### Tibial Plateau – Epiphysis

#### Bone Volume (BV) (mm<sup>3</sup>)

| Group                        | Control (R) limb  | Fractured (L) limb | Fractured(L) – Control(R)<br>*significantly different than zero<br>#significant difference with treatment |
|------------------------------|-------------------|--------------------|-----------------------------------------------------------------------------------------------------------|
| Local-Saline                 | 0.675 $\pm$ 0.056 | 0.722 $\pm$ 0.100  | 0.047 $\pm$ 0.059                                                                                         |
| Local-IL-1Ra                 | 0.668 $\pm$ 0.079 | 0.667 $\pm$ 0.050  | 0.000 $\pm$ 0.061                                                                                         |
| Local-sTNFR <sub>II</sub>    | 0.623 $\pm$ 0.035 | 0.726 $\pm$ 0.106  | 0.103 $\pm$ 0.115*                                                                                        |
| Systemic-Saline              | 0.583 $\pm$ 0.035 | 0.568 $\pm$ 0.066  | -0.015 $\pm$ 0.151                                                                                        |
| Systemic-IL-1Ra              | 0.519 $\pm$ 0.038 | 0.423 $\pm$ 0.137  | -0.097 $\pm$ 0.117                                                                                        |
| Systemic-sTNFR <sub>II</sub> | 0.603 $\pm$ 0.065 | 0.661 $\pm$ 0.174  | 0.058 $\pm$ 0.169                                                                                         |

#### Bone Fraction [Bone Volume (BV)/Total Volume (TV) ]

| Group                        | Control (R) limb  | Fractured (L) limb | Fractured(L) – Control(R)<br>*significantly different than zero<br>#significant difference with treatment |
|------------------------------|-------------------|--------------------|-----------------------------------------------------------------------------------------------------------|
| Local-Saline                 | 0.308 $\pm$ 0.043 | 0.382 $\pm$ 0.106  | 0.074 $\pm$ 0.129                                                                                         |
| Local-IL-1Ra                 | 0.308 $\pm$ 0.050 | 0.357 $\pm$ 0.084  | 0.049 $\pm$ 0.071                                                                                         |
| Local-sTNFR <sub>II</sub>    | 0.729 $\pm$ 0.032 | 0.684 $\pm$ 0.084  | -0.045 $\pm$ 0.088 #                                                                                      |
| Systemic-Saline              | 0.608 $\pm$ 0.111 | 0.537 $\pm$ 0.181  | -0.071 $\pm$ 0.150                                                                                        |
| Systemic-IL-1Ra              | 0.479 $\pm$ 0.037 | 0.357 $\pm$ 0.059  | -0.122 $\pm$ 0.056*                                                                                       |
| Systemic-sTNFR <sub>II</sub> | 0.670 $\pm$ 0.078 | 0.503 $\pm$ 0.125  | -0.167 $\pm$ 0.109*                                                                                       |

#### Bone Density (mg/cm<sup>3</sup>)

| Group                        | Control (R) limb | Fractured (L) limb | Fractured(L) – Control(R)<br>*significantly different than zero<br>#significant difference with treatment |
|------------------------------|------------------|--------------------|-----------------------------------------------------------------------------------------------------------|
| Local-Saline                 | 1137 $\pm$ 29    | 1124 $\pm$ 30      | -12 $\pm$ 28                                                                                              |
| Local-IL-1Ra                 | 1143 $\pm$ 14    | 1117 $\pm$ 25      | -26 $\pm$ 17*                                                                                             |
| Local-sTNFR <sub>II</sub>    | 1160 $\pm$ 13    | 1110 $\pm$ 26      | -51 $\pm$ 32*<br>#                                                                                        |
| Systemic-Saline              | 1152 $\pm$ 25    | 1103 $\pm$ 63      | -49 $\pm$ 60*                                                                                             |
| Systemic-IL-1Ra              | 1127 $\pm$ 19    | 1083 $\pm$ 77      | -45 $\pm$ 41*                                                                                             |
| Systemic-sTNFR <sub>II</sub> | 1148 $\pm$ 24    | 1077 $\pm$ 33      | -71 $\pm$ 24*                                                                                             |

### Tibial Plateau – Metaphysis

| Bone Volume (BV) (mm <sup>3</sup> ) |                  |                    |                                                                                                                         |
|-------------------------------------|------------------|--------------------|-------------------------------------------------------------------------------------------------------------------------|
| Group                               | Control (R) limb | Fractured (L) limb | Fractured(L) – Control(R)<br><i>*significantly different than zero</i><br><i>#significant difference with treatment</i> |
| Local-Saline                        | 0.846±0.183      | 0.930±0.205        | 0.084±0.257                                                                                                             |
| Local-IL-1Ra                        | 0.846±0.208      | 1.001±0.180        | 0.155±0.323                                                                                                             |
| Local-sTNFRII                       | 0.730±0.145      | 1.164±0.184        | 0.434±0.108* <sup>#</sup>                                                                                               |
| Systemic-Saline                     | 0.731±0.226      | 0.862±0.225        | 0.131±0.153* <sup>#</sup>                                                                                               |
| Systemic-IL-1Ra                     | 0.518±0.054      | 0.911±0.165        | 0.393±0.188* <sup>#</sup>                                                                                               |
| Systemic-sTNFRII                    | 0.822±0.243      | 1.061±0.297        | 0.239±0.216*                                                                                                            |

  

| Bone Density (mg/cm <sup>3</sup> ) |                  |                    |                                                                                                                         |
|------------------------------------|------------------|--------------------|-------------------------------------------------------------------------------------------------------------------------|
| Group                              | Control (R) limb | Fractured (L) limb | Fractured(L) – Control(R)<br><i>*significantly different than zero</i><br><i>#significant difference with treatment</i> |
| Local-Saline                       | 1024±33          | 1030±33            | 6±57                                                                                                                    |
| Local-IL-1Ra                       | 1040±47          | 1022±25            | -18±42                                                                                                                  |
| Local-sTNFRII                      | 1066±21          | 1016±27            | -50±38*                                                                                                                 |
| Systemic-Saline                    | 1047±22          | 1032±26            | -15±38                                                                                                                  |
| Systemic-IL-1Ra                    | 1067±39          | 1011±19            | -56±48*                                                                                                                 |
| Systemic-sTNFRII                   | 1028±29          | 993±16             | -35±29*                                                                                                                 |

### Femoral Condyles – Cancellous Bone

| Bone Fraction (BV/TV) |                  |                    |                                                                                                                         |
|-----------------------|------------------|--------------------|-------------------------------------------------------------------------------------------------------------------------|
| Group                 | Control (R) limb | Fractured (L) limb | Fractured(L) – Control(R)<br><i>*significantly different than zero</i><br><i>#significant difference with treatment</i> |
| Local-Saline          | 0.703±0.072      | 0.633±0.097        | -0.070±0.109*                                                                                                           |
| Local-IL-1Ra          | 0.739±0.063      | 0.663±0.076        | -0.076±0.089*                                                                                                           |
| Local-sTNFRII         | 0.699±0.050      | 0.619±0.100        | -0.080±0.088*                                                                                                           |
| Systemic-Saline       | 0.678±0.081      | 0.584±0.105        | -0.093±0.129*                                                                                                           |
| Systemic-IL-1Ra       | 0.654±0.069      | 0.521±0.073        | -0.133±0.066*                                                                                                           |
| Systemic-sTNFRII      | 0.659±0.056      | 0.515±0.102        | -0.145±0.133*                                                                                                           |

  

| Bone Density (mg/cm <sup>3</sup> ) |                  |                    |                                                                                                                         |
|------------------------------------|------------------|--------------------|-------------------------------------------------------------------------------------------------------------------------|
| Group                              | Control (R) limb | Fractured (L) limb | Fractured(L) – Control(R)<br><i>*significantly different than zero</i><br><i>#significant difference with treatment</i> |
| Local-Saline                       | 1077±32          | 1068±36            | -9±52                                                                                                                   |
| Local-IL-1Ra                       | 1051±46          | 1080±30            | 29±53* <sup>#</sup>                                                                                                     |
| Local-sTNFRII                      | 1120±19          | 1109±30            | -11±33                                                                                                                  |
| Systemic-Saline                    | 1130±35          | 1113±28            | -17±39*                                                                                                                 |
| Systemic-IL-1Ra                    | 1130±26          | 1118±19            | -12±27                                                                                                                  |
| Systemic-sTNFRII                   | 1133±32          | 1115±26            | -17±41                                                                                                                  |
